# Supplementary material for: Effect of gamma irradiation on the physical properties of MoS2 monolayer
Source: Royal Society of Chemistry journal article supplement (doi:10.1039/d3cp02925e), 2023-01-01
Supplement: d3cp02925e1.pdf [file d3cp02925e1.pdf]

**Table. S1** Electronic properties of pristine and defected MoS<sub>2</sub>.

| Data of band structures, DOS (eV) | MoS <sub>2</sub> | 1S defect in MoS <sub>2</sub> | 2S defect in MoS <sub>2</sub> | 1Mo 2S defect in MoS <sub>2</sub> |
|-----------------------------------|------------------|-------------------------------|-------------------------------|-----------------------------------|
| E <sub>f</sub> (Fermi Energy)     | 3.1637           | 2.8485                        | 2.7394                        | 2.4336                            |
| E <sub>g</sub> (Bandgap Energy)   | 1.83             | 1.0257                        | 0.9759                        | 0.8687                            |
| E <sub>t</sub> (Total Energy)     | -4516.31683242   | -4495.54378458                | -4474.87910457                | -4335.08260142                    |

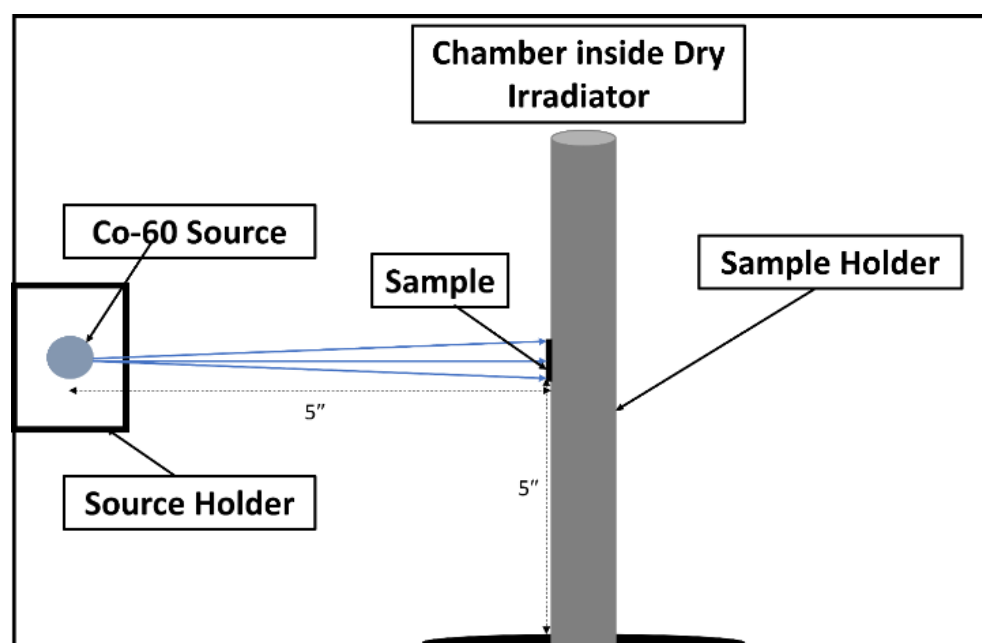

**Fig. S1** Gamma irradiation experimental setup using <sup>60</sup>Co source inside irradiator.
